# Supplementary material for: Concurrent Climate Extremes and Impacts on Ecosystems in Southwest China
Source: MDPI journal article supplement (doi:10.3390/rs14071678), 2022-03-31
Supplement: s1 [file s1]

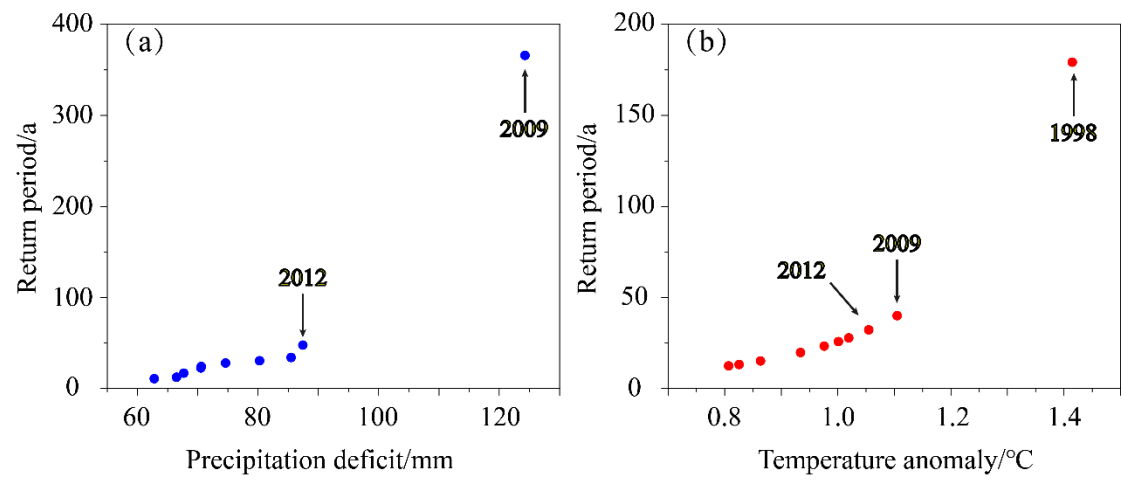

**Figure S1.** Precipitation-based (a) and temperature-based (b) univariate return period in Southwest China and their corresponding years (black text).

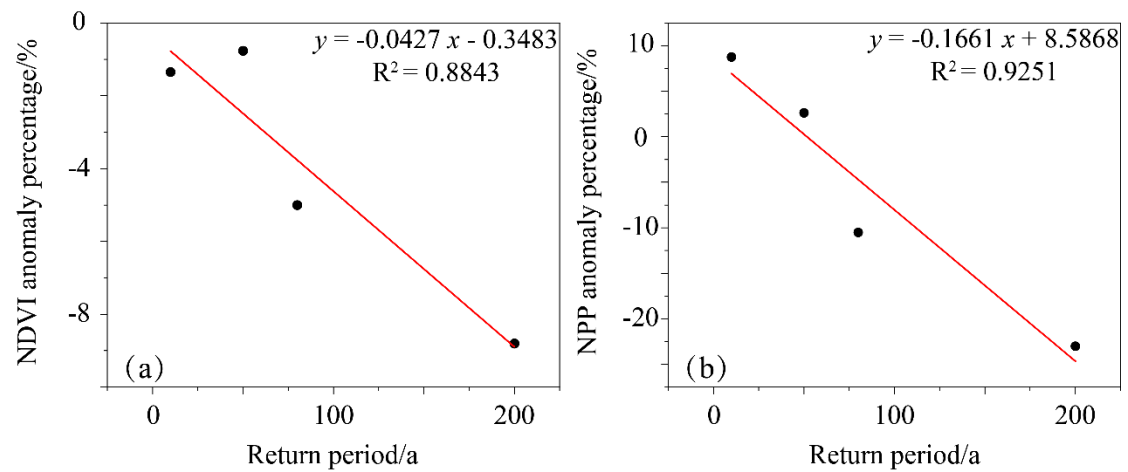

**Figure S2.** The quantitative relationship between return period of concurrent events and NDVI (a) and NPP (b) anomaly percentages
